# Supplementary material
Source: publisher figshare collection journal article supplement (https://sage.figshare.com/ndownloader/files/28361105)
Supplement: Supplementary file 1 [file 28361105]

**Supplementary material**

Table S1. Cognitive-Perceptive Basic Symptoms

---

|                                                                                           |
|-------------------------------------------------------------------------------------------|
| thought interference                                                                      |
| thought perseveration                                                                     |
| thought pressure                                                                          |
| thought blockages                                                                         |
| disturbance of receptive speech                                                           |
| unstable ideas of reference                                                               |
| derealisation                                                                             |
| visual perception disturbances                                                            |
| acoustic perception disturbances                                                          |
| decreased ability to discriminate between ideas and perception, fantasy and true memories |

---

Table S2. Narrative Examples of Agency Themes

| Theme                      | Examples                                                                                                                                                                                                                                                                                    |
|----------------------------|---------------------------------------------------------------------------------------------------------------------------------------------------------------------------------------------------------------------------------------------------------------------------------------------|
| Self-Mastery               | “I believe this move helped shape me to become the person I am today and made me resilient. It was such an important event because for me it symbolised independence and adulthood”.                                                                                                        |
| Achievement/Responsibility | “It has impacted me greatly as it was my first and only experience of traveling overseas and it showed me what I could achieve through my independence. Leaving home and experiencing another culture in such immersion was also what helped inspire me to leave home to Dunedin to study”. |
| Empowerment                | “As a result of that night, I'm now much more motivated to take action – to right the wrongs I see in the world... I want to help others more than I want to help myself”.                                                                                                                  |
